# Supplementary material
Source: HighWire-hosted journal article supplement (http://ajnr-stage2.highwire.org/highwire/filestream/65155/field_highwire_adjunct_files/0/18-00683.pdf)
Supplement: 18-00683.pdf [file 18-00683.pdf]

**On-line Table: ROC results for FLAIR and T1-weighted images, separated by image quality**

|                                                    | ROC Results      |                  |                  |                  |
|----------------------------------------------------|------------------|------------------|------------------|------------------|
|                                                    | Rater 1          | Rater 2          | Rater 3          | Rater 4          |
| Sensitivity and specificity for FLAIR images       |                  |                  |                  |                  |
| Good-quality images                                |                  |                  |                  |                  |
| AUC (95% CI)                                       | 93.4 (88.3–98.8) | 86.5 (78.2–94.8) | 86.5 (78.2–94.8) | 87.5 (79.3–95.7) |
| Sensitivity (95% CI)                               | 96.4 (81.7–99.9) | 78.6 (59.0–91.7) | 78.6 (59.0–91.7) | 75.0 (55.1–89.3) |
| Specificity (95% CI)                               | 90.7 (79.7–96.9) | 94.4 (84.6–98.8) | 94.4 (84.6–98.8) | 100 (93.4–100)   |
| Poor-quality images                                |                  |                  |                  |                  |
| AUC (95% CI)                                       | 95.8 (87.7–100)  | 91.7 (80.7–100)  | 90.0 (70.4–100)  | 100 (100–100)    |
| Sensitivity (95% CI)                               | 100 (47.8–100)   | 100 (47.8–100)   | 80.0 (28.4–99.5) | 100 (47.8–100)   |
| Specificity (95% CI)                               | 91.7 (61.5–99.8) | 83.3 (51.6–97.9) | 100 (73.5–100)   | 100 (73.5–100)   |
| Sensitivity and specificity for T1-weighted images |                  |                  |                  |                  |
| Good-quality images                                |                  |                  |                  |                  |
| AUC (95% CI)                                       | 89.5 (80.7–98.3) | 82.1 (71.7–92.5) | 70.4 (59.4–81.4) | 76.2 (65.2–87.1) |
| Sensitivity (95% CI)                               | 81.0 (58.1–94.6) | 76.2 (52.8–91.8) | 42.9 (21.8–66.0) | 52.4 (29.8–74.3) |
| Specificity (95% CI)                               | 98.0 (89.4–99.9) | 88.0 (75.7–95.5) | 98.0 (89.4–99.9) | 100 (92.9–100)   |
| Poor-quality images                                |                  |                  |                  |                  |
| AUC (95% CI)                                       | 71.4 (51.6–91.2) | 77.4 (53.0–100)  | 64.3 (46.2–82.4) | NA <sup>a</sup>  |
| Sensitivity (95% CI)                               | 42.9 (9.9–81.6)  | 71.4 (29.0–96.3) | 28.6 (3.7–71.0)  | NA <sup>a</sup>  |
| Specificity (95% CI)                               | 100 (54.1–100)   | 83.3 (35.9–99.6) | 100 (54.1–100)   | NA <sup>a</sup>  |

**Note:**—NA indicates not applicable.

<sup>a</sup> Rater 4 did not rate any T1-weighted image as being of poor quality.
